# Supplementary material for: Ca2YScAl2Si2O12:Cr3+ phosphor-in-glass film for laser-driven high-power near-infrared lighting
Source: Royal Society of Chemistry journal article supplement (doi:10.1039/d4tc05209a), 2025-01-01
Supplement: d4tc05209a1.pdf [file d4tc05209a1.pdf]

Electronic Supplementary Material (ESI) for Journal of Materials Chemistry C.

## **Ca<sub>2</sub>YScAl<sub>2</sub>Si<sub>2</sub>O<sub>12</sub>:Cr<sup>3+</sup> phosphor-in-glass film for laser-driven high-power near-infrared lighting**

Yi Lin,<sup>a,c</sup> Gaoming Dong,<sup>a,c</sup> Hang Lin,<sup>\*c,d</sup> Bo Wang,<sup>e</sup> Pengfei Wang,<sup>d</sup> Ju Xu,<sup>d</sup> Yao Cheng,<sup>d</sup> Yan Xiong,<sup>b</sup> Yuansheng Wang<sup>\*d</sup>

<sup>a</sup> College of Chemistry, Fuzhou University, Fuzhou, Fujian, 350002, China.

<sup>b</sup> Hubei Provincial Key Laboratory of Green Materials for Light Industry, Hubei University of Technology, Wuhan, Hubei, 430068, China

<sup>c</sup> State Key Laboratory of Structural Chemistry, Fujian Institute of Research on the Structure of Matter, Chinese Academy of Sciences, Fuzhou, Fujian, 350002, China.

<sup>d</sup> Fujian Key Laboratory of Nanomaterials, Fujian Institute of Research on the Structure of Matter, Chinese Academy of Sciences, Fuzhou, Fujian, 350002, China.

<sup>e</sup> School of Applied Physics and Materials, Wuyi University, Jiangmen, Guangdong, 529020, China.

---

E-mail: lingsh@fjirsm.ac.cn; Tel/Fax: +86-591-63179423

E-mail: yswang@fjirsm.ac.cn; Tel/Fax: +86-591-63179438

## Supplementary Note S1:

All decay curves of Cr<sup>3+</sup> ions can be fitted with a double-exponential function:<sup>1</sup>

$$I_t = I_0 + A_1 \exp\left(\frac{-t}{\tau_1}\right) + A_2 \exp\left(\frac{-t}{\tau_2}\right) \#(S1)$$

$$\tau^* = \frac{A_1 \tau_1^2 + A_2 \tau_2^2}{A_1 \tau_1 + A_2 \tau_2} \#(S2)$$

where  $I_t$  and  $I_0$  are the luminescence intensity and the initial intensity at  $t = 0$ , respectively;  $A_1$  and  $A_2$  are constants;  $\tau_1$  and  $\tau_2$  are the decay times for fast and slow exponential components, respectively; and  $\tau^*$  is the average fluorescence decay time.

The  $\tau^*$  changes obviously with the monitor wavelength, indicating more than one emission centers. The decay curves are well fitted with a double-exponential function, indicating that the existence of two emitting centers.

## Supplementary Note S2:

The corresponding crystal field parameters for Cr<sup>3+</sup> can be calculated by using the following formulas proposed by Henry, Tanabe, and Sugano:<sup>2-4</sup>

$$10D_q = E(^4A_{2g} \rightarrow ^4T_{2g}) - \Delta S/2 \#(S3)$$

$$D_q/B = \frac{15(\Delta E/D_q - 8)}{(\Delta E/D_q)^2 - 10(\Delta E/D_q)} \#(S4)$$

$$\Delta E = E(^4A_{2g} \rightarrow ^4T_{1g}) - E(^4A_{2g} \rightarrow ^4T_{2g}) \#(S5)$$

$$\Delta S = E(^4A_{2g} \rightarrow ^4T_{2g}) - E(^4T_{2g} \rightarrow ^4A_{2g}) \#(S6)$$

where  $D_q$  and  $B$  are the crystal field splitting energy and Racah parameter, respectively. The values of  $E(^4A_{2g} \rightarrow ^4T_{1g})$  and  $E(^4A_{2g} \rightarrow ^4T_{2g})$  are calculated from the corresponding peak energy of the excitation band, and  $\Delta E$  represents the energy difference between these two energy levels. The Stokes shift  $\Delta S$  is calculated from the peak position of the PLE spectrum corresponding to  $E(^4A_{2g} \rightarrow ^4T_{2g})$  and the peak position in the PL spectrum corresponding to  $E(^4T_{2g} \rightarrow ^4A_{2g})$ .

Selecting the peak energy of  ${}^4A_{2g} \rightarrow {}^4T_{2g}$  (15949  $\text{cm}^{-1}$ ), peak energy of  ${}^4A_{2g} \rightarrow {}^4T_{1g}$  (22989  $\text{cm}^{-1}$ ) and peak energy of  ${}^4T_{2g} \rightarrow {}^4A_{2g}$  (12422  $\text{cm}^{-1}$ ),  $\Delta E$ ,  $\Delta S$  and  $D_q$  were calculated to be 7040  $\text{cm}^{-1}$ , 3527  $\text{cm}^{-1}$  and 1418.55  $\text{cm}^{-1}$ , respectively. Therefore, the value of  $D_q/B$  representing the strength of the crystal field was calculated to be  $1.82 < 2.3$ , which demonstrates  $\text{Cr}^{3+}$  locates in a weak crystal field, leading to broadband emission. Furthermore, on the basis of negligible change in peak position of  ${}^4A_{2g} \rightarrow {}^4T_{2g}$  and  ${}^4A_{2g} \rightarrow {}^4T_{1g}$  under different detection wavelengths (Fig. S2), selecting the peak energy of  $\text{Cr}(1):{}^4T_{2g} \rightarrow {}^4A_{2g}$  (12579  $\text{cm}^{-1}$ ) and the peak energy of  $\text{Cr}(2):{}^4T_{2g} \rightarrow {}^4A_{2g}$  (11377  $\text{cm}^{-1}$ ), the calculated  $D_q/B$  values for  $\text{Cr}(1)$  and  $\text{Cr}(2)$  were 1.84 and 1.71, respectively, supporting the fact that the  $\text{Cr}(2)$  dodecahedral site has weaker crystal field strength than the  $\text{Cr}(1)$  octahedral site.

**Table S1.** Comparisons made on luminescence performance parameters of several  $\text{Cr}^{3+}$ -doped garnet-type phosphors ( $\lambda_{\text{em}} > 800 \text{ nm}$ ).<sup>5-13</sup>

| Hosts                                                                   | $\lambda_{\text{ex}}$ (nm) | $\lambda_{\text{em}}$ (nm) | IQE (%) | $I_{423\text{K}}/I_{298\text{K}}$ | FWHM (nm)    | Refs.     |
|-------------------------------------------------------------------------|----------------------------|----------------------------|---------|-----------------------------------|--------------|-----------|
| $\text{La}_3\text{Sc}_2\text{Ga}_3\text{O}_{12}$                        | 490                        | 818                        | 35      | $\approx 75$                      | 145          | 5         |
| $\text{Ca}_4\text{ZrGe}_3\text{O}_{12}$                                 | 477                        | 840                        | 35      | $\approx 38$                      | 160          | 6         |
| $\text{Ca}_3\text{Y}_2\text{Ge}_3\text{O}_{12}$                         | 460                        | 800                        | 81      | \                                 | $\approx 76$ | 7         |
| $\text{Ca}_2\text{LuScGa}_2\text{Ge}_2\text{O}_{12}$                    | 465                        | 800                        | \       | 59                                | 150          | 8         |
| $\text{Ca}_2\text{LuGa}_3\text{Ge}_2\text{O}_{12}$                      | 460                        | 803                        | \       | 89.5                              | 267          | 9         |
| $\text{Ca}_2\text{LaZr}_2\text{Ga}_{2.8}\text{Al}_{0.2}\text{O}_{12}$   | 450                        | 820                        | 58.3    | $\approx 64$                      | 160          | 10        |
| $\text{Mg}_3\text{Y}_2\text{Ge}_3\text{O}_{12}$                         | 436                        | 811                        | \       | \                                 | 226          | 11        |
| $\text{Gd}_3\text{Zn}_{0.8}\text{Ga}_{3.4}\text{Ge}_{0.8}\text{O}_{12}$ | 449                        | 800                        | 79.6    | 40.2                              | 202          | 12        |
| $\text{Gd}_3\text{Zn}_2\text{GaGe}_2\text{O}_{12}$                      | $\approx 460$              | 852                        | \       | \                                 | 211          | 12        |
| $\text{Ca}_2\text{LuScAl}_2\text{Si}_2\text{O}_{12}$                    | 442                        | 752/804                    | 73.7    | 76                                | 142          | 13        |
| $\text{Ca}_2\text{YScAl}_2\text{Si}_2\text{O}_{12}$                     | 435                        | 805                        | 63      | 60                                | 165          | This work |

**Table S2.** Comparisons made on NIR output power of several NIR pc-LD devices fabricated with Cr<sup>3+</sup>-doped fluorescent conversion materials.<sup>14-21</sup>

| Compounds                                                                                                               | NIR output power                      | Categories | Refs.     |
|-------------------------------------------------------------------------------------------------------------------------|---------------------------------------|------------|-----------|
| Gd <sub>3</sub> Al <sub>2</sub> Ga <sub>3</sub> O <sub>12</sub> :Cr <sup>3+</sup>                                       | 1652.6 mW@5.5 W                       | ceramic    | 14        |
| Y <sub>3</sub> Al <sub>5</sub> O <sub>12</sub> -Al <sub>2</sub> O <sub>3</sub> :Cr <sup>3+</sup>                        | ≈1400 mW@10.7 W                       | ceramic    | 15        |
| BaMgAl <sub>10</sub> O <sub>17</sub> :Cr <sup>3+</sup>                                                                  | 3.4 mW@100 mW                         | PiG        | 16        |
| MgO:Cr <sup>3+</sup> /Ni <sup>2+</sup>                                                                                  | 5.3 mW/mm <sup>2</sup>                | PiGF       | 17        |
| MgO:Cr <sup>3+</sup>                                                                                                    | 6360 mW                               | ceramic    | 18        |
| Gd <sub>3</sub> Sc <sub>2</sub> Al <sub>3</sub> O <sub>12</sub> :Cr <sup>3+</sup>                                       | 484.34 mW@2.3 A                       | ceramic    | 19        |
| Ca <sub>3</sub> Sc <sub>2</sub> Si <sub>3</sub> O <sub>12</sub> :Ce <sup>3+</sup> /Cr <sup>3+</sup> /Li <sup>+</sup>    | 1697 mW@22 W/mm <sup>2</sup>          | PiGF       | 20        |
| CaLu <sub>2</sub> Mg <sub>2</sub> Si <sub>3</sub> O <sub>12</sub> :Ce <sup>3+</sup> ,Cr <sup>3+</sup> ,Nd <sup>3+</sup> | 1218 mW@17 W(21.7 W/mm <sup>2</sup> ) | PiGF       | 21        |
| Ca <sub>2</sub> YScAl <sub>2</sub> Si <sub>2</sub> O <sub>12</sub> :Cr <sup>3+</sup>                                    | 2626 mW@17W(21.7W/mm <sup>2</sup> )   | PiGF       | This work |

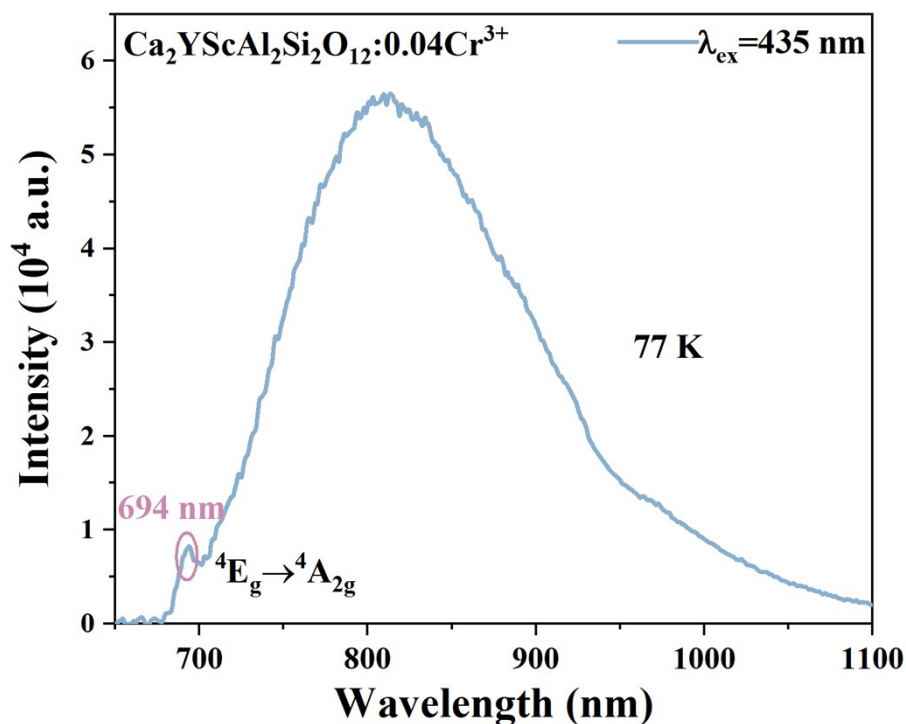

**Fig. S1.** PL spectrum of CYSAS:0.04Cr<sup>3+</sup> phosphor at 77 K.

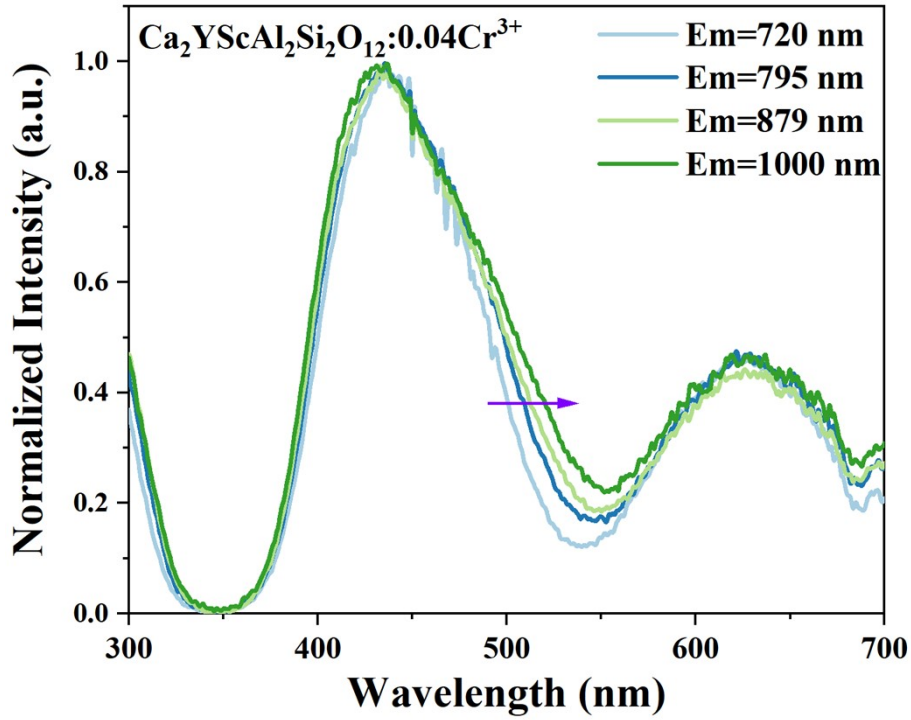

Fig. S2. Normalized PLE spectra of CYSAS:0.04Cr<sup>3+</sup> phosphor at different detection wavelengths.

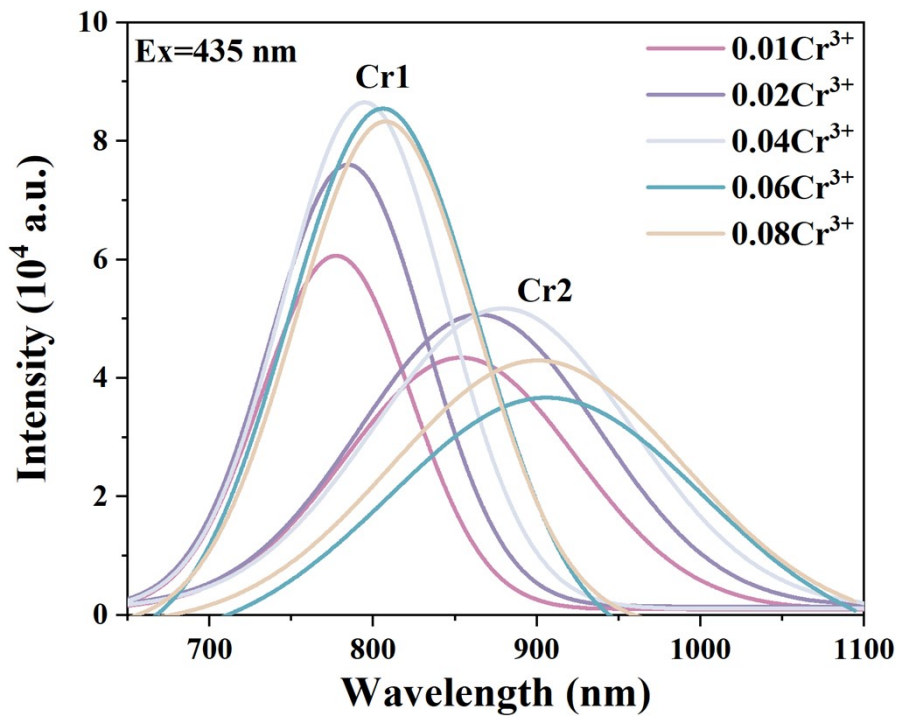

Fig. S3. Cr(1) and Cr(2) spectra fitted by a Gaussian function of CYSAS:yCr<sup>3+</sup> (y = 0.01-0.08) phosphors.

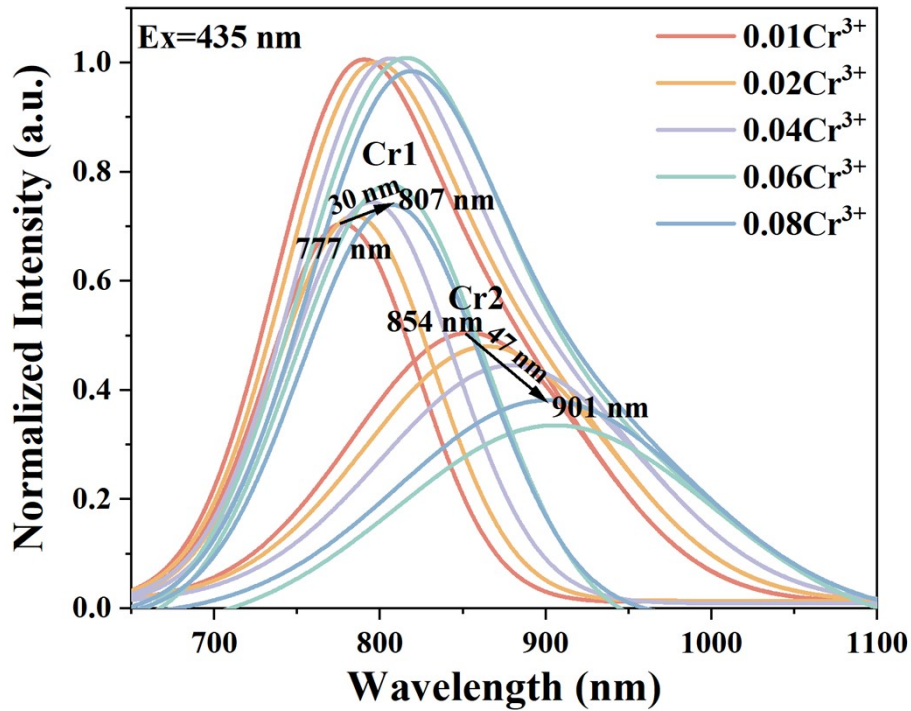

**Fig. S4.** Normalized PL spectra (including Cr(1) and Cr(2) spectra fitted by a Gaussian function) of CYSAS: $y\text{Cr}^{3+}$  ( $y = 0.01\text{-}0.08$ ) phosphors.

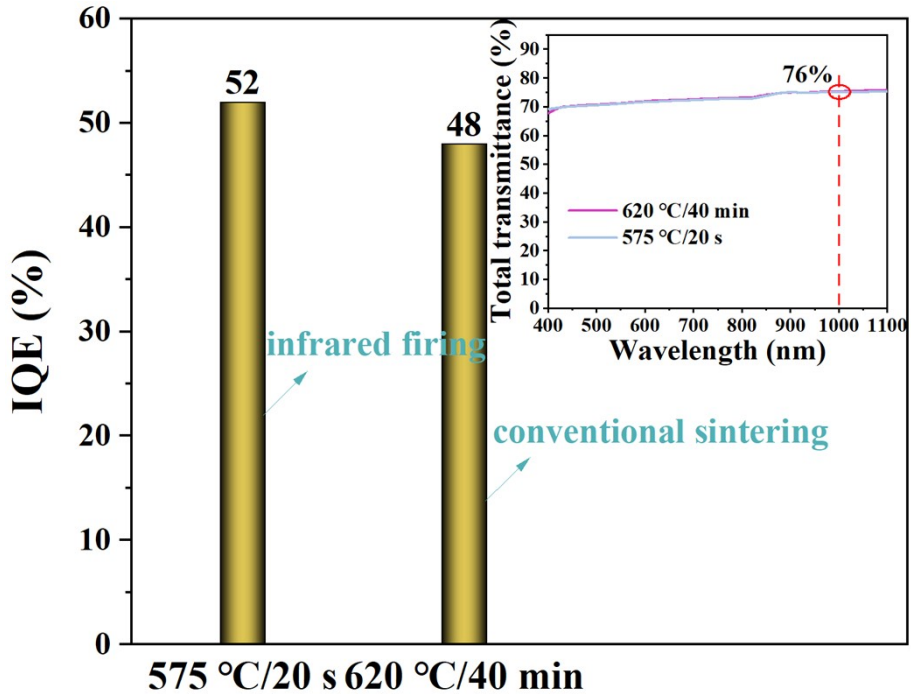

**Fig. S5.** IQE comparisons made on the CYSAS: $0.04\text{Cr}^{3+}$  PiGF-on-SP samples prepared employing a rapid infrared firing technique and a conventional thermal annealing method, respectively; the inset shows transmittance spectra (400-1100 nm) of bare glass films fabricated by using these two sintering processes.

## References

1. S. H. Miao, Y. J. Liang, Y. Zhang, D. X. Chen and X. J. Wang, *ACS Appl. Mater. Interfaces*, 2021, **13**, 36011-36019.
2. R. Y. Li, Y. F. Liu, C. X. Yuan, G. Leniec, L. J. Miao, P. Sun, Z. H. Liu, Z. H. Luo, R. Dong and J. Jiang, *Adv. Opt. Mater.*, 2021, **9**, 2100388.
3. A. Trueba, P. Garcia-Fernandez, J. M. García-Lastra, J. A. Aramburu, M. T. Barriuso and M. Moreno, *J. Phys. Chem. A*, 2011, **115**, 1423-1432.
4. C. X. Yuan, R. Y. Li, Y. F. Liu, L. L. Zhang, J. H. Zhang, G. Leniec, P. Sun, Z. H. Liu, Z. H. Luo, R. Dong and J. Jiang, *Laser Photon. Rev.*, 2021, **15**, 2100227.
5. B. Malysa, A. Meijerink and T. Jüstel, *J. Lumines.*, 2018, **202**, 523-531.
6. J. M. Xiang, J. M. Zheng, X. Q. Zhao, X. Zhou, C. H. Chen, M. K. Jin and C. F. Guo, *Mat. Chem. Front.*, 2022, **6**, 440-449.
7. N. Mao, S. Q. Liu, Z. Song, Y. Yu and Q. L. Liu, *J. Alloy. Compd.*, 2021, **863**, 158699.
8. B. Bai, P. P. Dang, D. Y. Huang, H. Z. Lian and J. Lin, *Inorg. Chem.*, 2020, **59**, 13481-13488.
9. T. C. Lang, M. S. Cai, S. Q. Fang, T. Han, S. S. He, Q. Y. Wang, G. H. Ge, J. Wang, C. Z. Guo, L. L. Peng, S. X. Cao, B. T. Liu, V. I. Korepanov, A. N. Yakovlev and J. B. Qiu, *Adv. Opt. Mater.*, 2022, **10**, 2101633.
10. Y. Liu, S. He, D. Wu, X. L. Dong and W. P. Zhou, *ACS Appl. Electron. Mater.*, 2022, **4**, 643-650.
11. X. Y. Meng, X. S. Zhang, X. L. Shi, K. L. Qiu, Z. J. Wang, D. W. Wang, J. X. Zhao, X. Li, Z. P. Yang and P. L. Li, *RSC Adv.*, 2020, **10**, 19106.
12. Y. Wang, Z. J. Wang, G. H. Wei, Y. B. Yang, S. X. He, J. H. Li, Y. W. Shi, R. Li, J. W. Zhang and P. L. Li, *Chem. Eng. J.*, 2022, **437**, 135346.
13. Y. Jin, Z. Zhou, R. X. Ran, S. Tan, Y. F. Liu, J. J. Zheng, G. T. Xiang, L. Ma and X. J. Wang, *Adv. Opt. Mater.*, 2022, **10**, 2202049.
14. H. J. Jiang, L. Y. Chen, G. J. Zheng, Z. H. Luo, X. H. Wu, Z. H. Liu, R. Y. Li, Y. F. Liu, P. Sun and J. Jiang, *Adv. Opt. Mater.*, 2022, **10**, 2102741.
15. G. J. Zheng, W. G. Xiao, H. J. Wu, J. H. Wu, X. F. Liu and J. R. Qiu, *Laser Photon. Rev.*, 2021, **15**, 2100060.
16. L. You, R. D. Tian, T. L. Zhou and R. J. Xie, *Chem. Eng. J.*, 2021, **417**, 129224.
17. S. M. Gu, B. M. Liu, S. C. Si and J. Wang, *J. Mater. Chem. C*, 2023, **11**, 9014-9022.
18. G. C. Liu, W. B. Chen, Z. Xiong, Y. Z. Wang, S. Zhang and Z. G. Xia, *Nat. Photonics*, 2024, **18**, 562-568.
19. Y. L. Ma, C. Y. Shao, L. Wu, X. C. Li, Y. Tian, L. W. Zeng, L. L. Lu, B. Q. Zhang, Z. C. Wang, X. Z. Chen, D. B. Xue, G. X. Jiang, Y. B. Hui, S. Q. Chen and D. Q. Chen, *Ceram. Int.*, 2024, **50**, 26624-26633.
20. P. Sui, W. Zhang, H. Lin, B. Wang, P. F. Wang, Y. Lin, J. Xu, Y. Cheng and Y. S. Wang, *J. Mater. Chem. C*, 2024, **12**, 15596-15606.
21. Y. Lin, H. Lin, P. F. Wang, J. Xu, Y. Cheng and Y. S. Wang, *Laser Photon. Rev.*,

2024, 2400995.
